# Supplementary material for: Pregnancy Outcomes: Effects of Metformin (POEM) study: a protocol for a long-term, multicentre, open-label, randomised controlled trial in gestational diabetes mellitus
Source: PubMed Central journal article supplement — BMJ Open. 2022 Mar 30;12(3):e056282. doi: 10.1136/bmjopen-2021-056282 (PMC8968576; doi:10.1136/bmjopen-2021-056282), 2022-03-30
Supplement: bmjopen-2021-056282supp001.pdf [file bmjopen-2021-056282supp001.pdf]

**Proefpersoneninformatie en toestemmingsformulier voor deelname aan POEM Fase A en B, medisch-wetenschappelijk onderzoek voor de zwangere en jonge moeder.****De POEM studie: een onderzoek ter verbetering van de behandeling van zwangerschapsdiabetes met een verwachte gezondheidswinst voor moeder en kind****Inleiding**

U ontvangt deze brief omdat bij u zwangerschapsdiabetes is vastgesteld met een suikerbelastingstest. Wij vragen u mee te doen aan een medisch-wetenschappelijk onderzoek naar de behandeling van zwangerschapsdiabetes met het medicijn metformine. Meedoen is vrijwillig. Om mee te doen is wel uw schriftelijke toestemming nodig. Voordat u beslist of u wilt meedoen, krijgt u uitleg over wat het onderzoek inhoudt. Lees deze informatie rustig door en vraag de onderzoeker meer uitleg als u vragen heeft. U kunt er ook over praten met uw partner, vrienden of familie.

Dit onderzoek is opgezet door het Bethesda Diabetes Research Center te Hoogeveen (BDRC).

Er doen in totaal 500 zwangere vrouwen mee aan dit onderzoek in Nederland. De Centrale Commissie Mensgebonden Onderzoek heeft dit onderzoek goedgekeurd. Algemene informatie over meedoen en toetsing van onderzoek vindt u in de brochure 'Medisch-wetenschappelijk onderzoek' (VWS). Deze kunt u downloaden op: <https://www.rijksoverheid.nl/documenten/brochures/2014/09/01/medisch-wetenschappelijk-onderzoek-algemene-informatie-voor-de-proefpersoon>.

**1. Doel van het onderzoek**

Zwangerschapsdiabetes is diabetes (= aandoening met te hoge bloedsuikers) ontstaan tijdens de zwangerschap. Zwangerschapsdiabetes verhoogt de kans op hoge bloeddruk tijdens de zwangerschap alsook de kans op overgewicht en type 2 diabetes tijdens het verdere leven bij moeder en kind. Voor het ongeboren kind geeft zwangerschapsdiabetes extra risico's zoals een hoog geboortegewicht, een vroegtijdige geboorte, meer complicaties bij de bevalling en lage bloedsuikers na de bevalling met kans op hersenschade. Op de lange termijn heeft het kind ook een verhoogde kans op overgewicht en diabetes. Al deze risico's willen we helpen verlagen met deze POEM studie.

Zwangerschapsdiabetes wordt nu vooral behandeld met dieet en insuline (injecties). Metformine (pillen) werkt volgens recent onderzoek veilig bij zwangerschapsdiabetes. Bovendien behandelt metformine meer de oorzaak van de diabetes: het pakt de verminderde insulinegevoeligheid aan. Het werkt mogelijk gunstiger voor moeder en kind dan de bestaande behandeling. Vandaar dit onderzoek. Metformine is al geregistreerd voor de behandeling van diabetes. Metformine blijkt de bloedsuikerspiegel én de insulinebehoefte te verlagen. Bovendien voorkomt metformine extra gewichtstoename bij moeder en kind. Vanwege deze gunstige effecten wordt metformine soms al bij zwangerschapsdiabetes gebruikt.

Metformine is (nog) niet geregistreerd voor gebruik bij de zwangerschap, maar is wel veilig gebleken in observatiestudies tijdens de zwangerschap. Metformine is een plantaardig product, afkomstig uit de Franse Lelie. Het doel van de POEM studie is om de werkzaamheid en veiligheid van metformine aan te tonen bij de behandeling van zwangerschapsdiabetes met een verwachte gezondheidswinst voor moeder en kind op de korte en lange termijn.

**2. Wat meedoen inhoudt**

In de studie worden twee groepen gevormd. Een groep die metformine krijgt en een groep die geen metformine krijgt. Via loting wordt bepaald in welke groep u terecht komt. Het onderzoek bestaat uit drie

**Proefpersoneninformatie en toestemmingsformulier voor deelname aan POEM Fase A en B, medisch-wetenschappelijk onderzoek voor de zwangere en jonge moeder.**

fasen. Fase A start vanaf de vaststelling van zwangerschapsdiabetes en duurt tot 6 weken na de bevalling. Fase B loopt van 6 weken tot 1 jaar na de bevalling. Wij vragen hierbij uw toestemming voor deelname aan Fase A en B. Deelname aan Fase A en B duurt maximaal anderhalf jaar.

*Fase C is een vervolgfase zonder studiemedicatie met een jaarlijkse medische beoordeling. In deze fase worden de effecten van metformine op lange termijn vastgesteld. Fase C duurt tot 20 jaar na de bevalling. Voorafgaand aan Fase C zullen wij opnieuw uw toestemming vragen voor deelname. Voor de volledigheid is wel alvast informatie over Fase C opgenomen in deze informatiebrief.*

**Keuring**

Als u met zwangerschapsdiabetes, vastgesteld via de suikerbelastingstest, heeft ingestemd met deelname zal de onderzoeker vragen naar uw medische voorgeschiedenis. U krijgt uitleg hoe u een bloedsuiker dagcurve maakt met 7 bloedsuikermetingen: voor en na de 3 hoofdmaaltijden en voor het naar bed gaan. U meet 2 bloedsuiker dagcurves in één week. Tevens wordt er bloed afgenomen. U wordt ook gevraagd om uw ochtend urine op te vangen en mee te nemen bij het tweede bezoek. Bij dat bezoek wordt er lichamenlijk onderzoek gedaan en opnieuw bloed afgenomen. Uw gewicht, lengte, bloeddruk en hartslag worden gemeten en u wordt gevraagd gezondheidsvragenlijsten in te vullen. De onderzoeker stelt daarbij vast of deelname aan de studie voor u van meerwaarde is.

**Behandeling**

Vanaf visite 2 krijgt de helft van de proefpersonen metformine, de andere helft de gebruikelijke zorg. Loting bepaalt in welke groep u zit. Beide groepen krijgen dieet- en leefstijladviezen.

Als u in de metforminegroep zit, neemt u de eerste week 1 tablet per dag, de tweede week 2 tabletten per dag en vanaf de derde week 3 tabletten per dag. Afhankelijk van hoe goed u de metformine kunt verdragen kan de dosering sneller of juist langzamer opgehoogd worden. U gebruikt metformine tot 1 jaar na de bevalling. Mocht desondanks de bloedsuiker tijdens de zwangerschapsdiabetes te hoog worden, dan volgt een aanvullende behandeling met insuline (injecties). Maar we verwachten dat metforminegebruikers dat niet of minder nodig hebben.

Als u niet in de metforminegroep zit, krijgt u de standaardbehandeling voor zwangerschapsdiabetes onder begeleiding van het onderzoeksteam: dieet- en leefstijladviezen en zo nodig de gebruikelijke insulinetherapie.

*Tijdens Fase C gebruikt u geen metformine (meer) vanwege de POEM studie. Tijdens deze fase volgen wij u en uw kind graag voor de mogelijke gezondheidswinst op langere termijn.*

**Bezoeken en metingen**

De frequentie van uw bezoek tijdens de zwangerschap (Fase A) is zoals gebruikelijk bij zwangerschapsdiabetes, ongeveer 1 keer per 4 weken. U komt gedurende Fase A maximaal 10 keer naar het ziekenhuis. Een bezoek duurt ongeveer 30 minuten. Gedurende Fase B bezoekt u het centrum 2 keer.

*Tijdens Fase C bezoekt u het centrum 1 keer per jaar.*

## Proefpersoneninformatie en toestemmingsformulier voor deelname aan POEM Fase A en B, medisch-wetenschappelijk onderzoek voor de zwangere en jonge moeder.

Tijdens de bezoeken worden de volgende testen en metingen gedaan:

- De Orale Glucose Tolerantie Test (OGTT), ook wel de suikerbelastingstest, is een test waarbij wordt gekeken hoe de bloedwaardes van glucose veranderen na het drinken van een glucosedrank. Door het drinken van de glucosedrank zal de glucosewaarde in het bloed stijgen. Het lichaam reageert hierop, en brengt de glucosewaarde weer naar beneden. Dit gebeurt onvoldoende bij een verstoorde glucosehuishouding. Deze test vindt tijdens deze onderzoeksfase (Fase A en B) 1 keer plaats. *Tijdens Fase C wordt er 10 keer een OGTT gedaan (1x per 2 jaar).*
- Lichamelijk onderzoek bij visite 2 en 6 weken na de bevalling door de arts (-onderzoeker).
- Bloedafname (waar mogelijk op gebruikelijke momenten): in Fase A en B minimaal 5 en maximaal 8 keer. Het aantal keren is afhankelijk van het startmoment van uw deelname aan het onderzoek en het moment van bevallen. *(In Fase C wordt er 1 keer per jaar bloed afgenomen.)* Bloedonderzoek is nodig om de werkzaamheid en veiligheid van metformine te bepalen. Een deel van het bloed wordt bewaard voor aanvullend wetenschappelijk onderzoek.
- Inleveren van urine voor onderzoek: in Fase A en B maximaal 6 keer. *(In Fase C 5 keer.)*
- Invullen van gezondheidsvragenlijsten: in Fase A en B maximaal 5 keer. *(In Fase C 10 keer.)*
- Bloedsuiker 7-punts dagcurves: 2 keer per week voorafgaande aan iedere visite in Fase A, naast de gebruikelijke 4-punts dagcurves op andere dagen volgens de geldende zorgrichtlijn.
- De moederkoek wordt onderzocht en navelstreng bloed wordt afgenomen voor nader onderzoek.

### Anders dan bij gebruikelijke zorg

Als u meedoet aan het onderzoek krijgt u dezelfde controles als wanneer u niet mee zou doen. De bezoeken in het kader van zwangerschapsdiabetes kunnen leiden tot een verplichte eigen bijdrage van de ziektekostenverzekering. Dat is ook het geval als u niet deelneemt aan deze studie en u behandeld zou moeten worden voor zwangerschapsdiabetes. Alle kosten die voor dit onderzoek worden gemaakt komen voor rekening van de onderzoeker, bijvoorbeeld extra echo's of bloed- en urineonderzoek. Met de extra metingen verkrijgen we extra informatie over hoe uw zwangerschap en zwangerschapsdiabetes verlopen.

### 3. Wat wordt er van u verwacht

Het is belangrijk dat u zich aan de volgende afspraken houdt:

- dat u de metformine volgens voorschrift inneemt, als u in de metformine-groep zit;
- dat u geen metformine gebruikt, als u in de controlegroep zit;
- dat u de bloedsuikermetingen volgens de instructies uitvoert;
- dat u uw afspraken voor bezoeken nakomt;
- dat u uw deelnemerskaart van het onderzoek bij u draagt. Laat deze kaart zien als u bij een andere arts komt.
- dat u niet tegelijkertijd aan een ander medisch-wetenschappelijk onderzoek meedoet.

Het is belangrijk dat u contact opneemt met de onderzoeker:

**Proefpersoneninformatie en toestemmingsformulier voor deelname aan POEM Fase A en B, medisch-wetenschappelijk onderzoek voor de zwangere en jonge moeder.**

- voordat u andere geneesmiddelen gaat gebruiken (ook homeopathische middelen, natuurgeneesmiddelen, vitaminen of geneesmiddelen van de drogist);
- als u in een ziekenhuis wordt opgenomen of behandeld;
- als u plotseling gezondheidsklachten krijgt;
- als u niet meer wilt meedoen aan het onderzoek;
- als uw contactgegevens wijzigen.

**Zwangerschap tijdens Fase B en C**

Wordt u tijdens het onderzoek opnieuw zwanger? Laat dit dan direct weten aan de onderzoeker. U kunt gewoon blijven deelnemen aan de POEM studie.

**4. Mogelijke bijwerkingen, mogelijke nadelige en voordelige effecten**

Metformine is al geregistreerd voor de behandeling van diabetes. Zeer vaak voorkomende tijdelijke bijwerkingen zijn maag- darmklachten. Meer informatie staat in de bijsluiters.

Metformine is tot op heden veilig gebleken bij het kind tijdens de zwangerschap. Metformine helpt tijdens de zwangerschap overmatige lichaamsgroei van het kind tegen te gaan zodat baby's minder zwaar worden. Dit kan mogelijke complicaties door een (te) groot kind bij de bevalling voorkomen, metformine verlaagt het risico op een hoge bloeddruk tijdens de zwangerschap. Metformine wordt in kleine hoeveelheden uitgescheiden in de moedermelk. Er zijn geen bijwerkingen gevonden bij baby's of jonge kinderen die borstvoeding kregen.

**5. Mogelijke voor- en nadelen van deelname aan onderzoek**

Zwangerschapsdiabetes wordt nu vooral behandeld met dieet en insuline (injecties). Voordeel van meedoen aan het onderzoek is, dat er een grotere kans bestaat dat u geen insuline hoeft te spuiten als u in de groep zit die metformine krijgt. Metformine leidt mogelijk tot gunstigere zwangerschapsuitkomsten voor u en uw kind. Tijdens de POEM studie wordt u zorgvuldig begeleid.

*Bij deelname aan Fase C zelfs tot 20 jaar na de bevalling.*

Deelname aan een onderzoek als de POEM studie gaat veelal gepaard met gunstigere gezondheidsresultaten dan bij een reguliere behandeling buiten de studie. Mogelijk komt dit door de extra begeleiding en de grotere bewustwording van de gunstige maatregelen voor de behandeling zwangerschapsdiabetes.

Nadelen van meedoen aan het onderzoek kunnen zijn dat u tijd kwijt bent aan de bezoeken die u moet afleggen. De (extra) testen kunnen leiden tot mogelijke ongemakken en u kunt last krijgen van mogelijke bijwerkingen van metformine (tijdelijke diarree, misselijkheid). Bloedafnames kunnen pijn doen of een bloeditstorting geven. In totaal wordt 5 tot 8 keer bloed bij u afgenomen in Fase A en B. Van de orale glucosetest kunt u tijdelijk wat misselijk worden.

**Proefpersoneninformatie en toestemmingsformulier voor deelname aan POEM Fase A en B, medisch-wetenschappelijk onderzoek voor de zwangere en jonge moeder.****6. Als u niet wilt meedoen of wilt stoppen met het onderzoek**

U wordt tweemaal om toestemming gevraagd om deel te nemen aan het totale onderzoek. Eenmaal voorafgaand aan Fase A en Fase B en eenmaal voorafgaand aan Fase C. Deelname is vrijwillig. Als u niet wilt meedoen, wordt u op de gebruikelijke manier behandeld voor uw zwangerschapsdiabetes. Als u wel meedoet aan het onderzoek, dan kunt u zich altijd bedenken. U mag tijdens het onderzoek stoppen. U wordt dan weer op de gebruikelijke manier behandeld voor uw zwangerschapsdiabetes. U hoeft niet te zeggen waarom u stopt. Wel moet u dit direct melden aan de onderzoeker om uw behandeling goed voort te kunnen zetten buiten het onderzoek om. De gegevens die tot dat moment zijn verzameld, worden gebruikt voor het onderzoek. Als u wilt, kan verzameld lichaamsmateriaal, zoals bloed of urine, worden vernietigd. Als er voor u nieuwe belangrijke informatie over het onderzoek is, dan laat de onderzoeker dit aan u weten. U wordt dan gevraagd of u wilt blijven meedoen.

**7. Einde van het onderzoek**

Uw deelname aan het onderzoek stopt als:

- alle bezoeken voorbij zijn;
- u zelf kiest om te stoppen;
- het einde van het hele onderzoek is bereikt;
- de onderzoeker het beter voor u vindt om te stoppen;
- de ethische toetsingscommissie of de overheid besluit om het onderzoek te stoppen.

Het hele onderzoek is afgelopen als alle deelnemers klaar zijn. Mocht u metformine of een andere behandeling na Fase B nodig hebben, dan zal de onderzoeker dat met u bespreken.

**8. Gebruik en bewaren van uw gegevens en lichaamsmateriaal**

Voor dit onderzoek is het nodig dat uw lichaamsmateriaal en uw medische en persoonsgegevens worden verzameld en gebruikt. Elke proefpersoon krijgt een code die op het lichaamsmateriaal en de gegevens komt te staan. Uw naam wordt weggelaten. Uw privacy is zo gewaarborgd.

**Uw gegevens**

Al uw gegevens blijven vertrouwelijk. Alleen het onderzoeksteam (arts en verpleegkundigen) weten welke code u heeft. Wij geven uw gegevens door aan de opdrachtgever van de POEM studie, maar alleen met die code, nooit met uw naam. De sleutel voor de code blijft bij de onderzoeker. Ook in rapporten over het onderzoek wordt alleen die code gebruikt.

Sommige mensen mogen uw medische- en persoonsgegevens inzien. Dit is om te controleren of het onderzoek goed en betrouwbaar is. Algemene informatie hierover vindt u in de brochure 'Medisch-wetenschappelijk onderzoek' van VWS.

Mensen die uw gegevens kunnen inzien zijn: het onderzoeksteam, een deskundig controleur en de Inspectie voor de Gezondheidszorg. Zij houden uw gegevens geheim. Als u de toestemmingsverklaring ondertekent, geeft u toestemming voor het verzamelen, bewaren en inzien van uw medische en persoonsgegevens. De onderzoeker bewaart uw gegevens tot 15 jaar na afronding van het onderzoek.

## **Proefpersoneninformatie en toestemmingsformulier voor deelname aan POEM Fase A en B, medisch-wetenschappelijk onderzoek voor de zwangere en jonge moeder.**

### **Uw lichaamsmateriaal**

Uw lichaamsmateriaal bewaren we gecodeerd en zorgvuldig. Het lichaamsmateriaal wordt gebruikt om de effecten van het metformine te kunnen vaststellen. Er wordt gekeken naar veranderingen in de stofwisseling die kunnen leiden tot het krijgen of voorkomen van chronische ziekten (zoals diabetes, hoge bloeddruk, hart en vaatziekten en kanker). Het lichaamsmateriaal zal uiterlijk tot 15 jaar na afronding van het onderzoek worden bewaard.

### **Later gebruik gegevens en/of lichaamsmateriaal**

Wij willen de ingevroren bloed- en urinemonsters bewaren om nieuwe inzichten over de lange termijn effecten van metformine bij zwangerschapsdiabetes te verkrijgen.

Op het toestemmingsformulier kunt u aangeven of u hiermee akkoord gaat. U kunt deze toestemming altijd weer intrekken. Uw bloed- en urinemonsters worden dan vernietigd. Als er al metingen in uw monsters zijn gedaan, worden de resultaten daarvan wel gebruikt.

De POEM studie is officieel geregistreerd in een wetenschappelijk onderzoeksregister ([www.clinicaltrials.gov](http://www.clinicaltrials.gov)). Deze website bevat geen informatie die herleidbaar is tot u als persoon. Wel kan de website een samenvatting van de resultaten tonen.

## **9. Verzekering voor proefpersonen**

Voor iedere zwangere die meedoet aan dit onderzoek is een verzekering afgesloten. De verzekering dekt schade door het onderzoek. In **bijlage B** vindt u meer informatie over de verzekering.

## **10. Informeren huisarts en/of behandelend specialist en/of apotheker**

Wij sturen uw behandelaar een brief om te laten weten dat u meedoet aan het onderzoek. Dit is in uw belang en een voorwaarde om mee te kunnen doen. U kunt niet deelnemen aan het onderzoek als u geen huisarts heeft.

## **11. Vergoeding voor meedoen**

De bezoeken in het kader van het onderzoek in Fase A vallen samen met de bezoeken die u zou hebben in het kader van controle van uw zwangerschapsdiabetes. Deze bezoeken komen dan ook ten laste van de ziektekostenverzekering en vallen dus mogelijk onder uw verplicht eigen risico.

Kosten die speciaal voor dit onderzoek worden gemaakt komen voor rekening van de onderzoeker, zoals extra echo's en bloed- en urineonderzoek en de metformine tijdens Fase A en Fase B.

Voor de bezoeken in het kader van het onderzoek in Fase B ontvangt u een reiskostenvergoeding, parkeergeld en eventuele kosten voor een maaltijd.

## **12. Heeft u vragen?**

Bij vragen kunt u contact opnemen met het onderzoeksteam. Voor onafhankelijk advies over meedoen aan dit onderzoek kunt u terecht bij de onafhankelijke arts. Deze arts weet veel over het onderzoek, maar heeft niets te maken met dit onderzoek. Bij klachten kunt u altijd terecht bij ons studieteam of zo nodig extern bij de Klachtenfunctionaris. Alle gegevens hiervoor vindt u in **bijlage A**: Contactgegevens.

**Proefpersoneninformatie en toestemmingsformulier voor deelname aan POEM Fase A en B, medisch-wetenschappelijk onderzoek voor de zwangere en jonge moeder.**

**13. Bijlagen bij deze informatie**

- A. Contactgegevens
- B. Informatie over de verzekering
- C. Toestemmingsformulieren proefpersoon Fase A en B

**Proefpersoneninformatie en toestemmingsformulier voor deelname aan POEM Fase A en B, medisch-wetenschappelijk onderzoek voor de zwangere en jonge moeder.****Bijlage A: Contactgegevens voor Treant**

Hoofdonderzoeker:

Onderzoekslocatie:

Adres:

Telefoonnummer:

In spoedgevallen buiten kantooruren kunt u contact opnemen met het telefoonnummer van de huisartsenpost 0528 – 286222 (of: de huisartsenpost van uw woonplaats).

Onderzoeksverpleegkundige:

Onderzoekslocatie:

Adres:

Telefoonnummer:

Onafhankelijk arts:

Locatie:

Adres:

Telefoonnummer:

Onafhankelijk arts:

Locatie:

Adres:

Telefoonnummer

Als u klachten heeft met betrekking tot dit onderzoek kunt u dit melden aan het onderzoeksteam of contact opnemen met de Klachtenfunctionaris.

Klachtenfunctionaris:



**Proefpersoneninformatie en toestemmingsformulier voor deelname aan POEM Fase A en B, medisch-wetenschappelijk onderzoek voor de zwangere en jonge moeder.****Bijlage B: Informatie over de verzekering**

Voor iedere zwangere die meedoet aan dit onderzoek, heeft verrichter een verzekering afgesloten. De verzekering dekt schade door deelname aan het onderzoek. Dit geldt voor schade tijdens het onderzoek of binnen vier jaar na het einde ervan. Schade moet u binnen die vier jaar aan de verzekeraar hebben gemeld.

De verzekering dekt niet alle schade. Onderaan deze tekst staat in het kort welke schade niet wordt gedekt.

Deze bepalingen staan in het Besluit verplichte verzekering bij medisch-wetenschappelijk onderzoek met mensen. Dit besluit staat op [www.ccmo.nl](http://www.ccmo.nl), de website van de Centrale Commissie Mensgebonden Onderzoek (zie: 'Bibliotheek' en dan 'Wet- en regelgeving').

De verzekeraar van het onderzoek is:

Naam: Onderlinge waarborgmaatschappij Centramed B.A

Adres: Appelgaarde 4, 2272 TK Voorburg

Telefoonnummer: 070 301 7070

E-mail: [info@centramed.nl](mailto:info@centramed.nl)

Polisnummer 626.107.132

De verzekering biedt een dekking van € 650.000 per proefpersoon en € 5.000.000 voor het hele onderzoek € 7.500.000 per jaar voor alle onderzoeken van dezelfde opdrachtgever).

De verzekering dekt de volgende schade **niet**:

- schade door een risico waarover u in de schriftelijke informatie bent ingelicht. Dit geldt niet als het risico zich ernstiger voordoet dan was voorzien of als het risico heel onwaarschijnlijk was;
- schade aan uw gezondheid die ook zou zijn ontstaan als u niet aan het onderzoek had meegedaan;
- schade door het niet (volledig) opvolgen van aanwijzingen of instructies;
- schade aan uw nakomelingen, als gevolg van een negatief effect van het onderzoek op u of uw nakomelingen;
- schade door een bestaande behandelmethode bij onderzoek naar bestaande behandelmethoden.

**Proefpersoneninformatie en toestemmingsformulier voor deelname aan POEM Fase A en B, medisch-wetenschappelijk onderzoek voor de zwangere en jonge moeder.****Bijlage C: Toestemmingsformulier proefpersoon Fase A en B****POEM studie: een lange termijn, gerandomiseerd onderzoek ter verbetering van de behandeling van zwangerschapsdiabetes.**

- Ik heb de informatiebrief gelezen. Ook kon ik vragen stellen. Mijn vragen zijn voldoende beantwoord. Ik had genoeg tijd om te beslissen of ik meedoe.
- Ik weet dat meedoen vrijwillig is. Ook weet ik dat ik op ieder moment kan beslissen om toch niet mee te doen of te stoppen met het onderzoek. Daarvoor hoef ik geen reden te geven.
- Ik geef toestemming om mijn huisarts/specialist(en) die mij behandelt te informeren dat ik meedoe aan dit onderzoek.
- Ik geef toestemming om informatie op te vragen bij huisarts/specialist(en) die mij behandelt.
- Ik weet dat sommige mensen mijn gegevens kunnen inzien. Die mensen staan vermeld in deze informatiebrief.
- Ik geef toestemming voor gebruik van de bloed- en urinemonsters op de manier en voor de doelen die in de informatiebrief staan.
- Ik geef toestemming om mijn gegevens nog 15 jaar na dit onderzoek te bewaren.
- Ik geef  **WEL**  
 **GEEN**  
toestemming om mijn urine- en bloedmonsters nog 15 jaar na dit onderzoek te bewaren. Mogelijk kan dit later nog voor meer onderzoek worden gebruikt, zoals in de informatiebrief staat.
- Ik wil meedoen aan **Fase A en B** (dat is tot en met 1 jaar na de bevalling)
- Ik geef  **WEL**  
 **GEEN**  
toestemming om mij na dit onderzoek opnieuw te benaderen voor een vervolgonderzoek (Fase C).

Naam proefpersoon:

Handtekening:

Datum: \_\_ / \_\_ / \_\_

Ik verklaar dat ik deze proefpersoon volledig heb geïnformeerd over het genoemde onderzoek. Als er tijdens het onderzoek informatie bekend wordt die de toestemming van de proefpersoon zou kunnen beïnvloeden, dan breng ik haar daarvan tijdig op de hoogte.

Naam onderzoeker:

Handtekening:

Datum: \_\_ / \_\_ / \_\_

Aanvullende informatie is gegeven door: (Naam en functie):

Handtekening:

Datum: \_\_ / \_\_ / \_\_

*De proefpersoon krijgt een volledige informatiebrief mee, samen met een origineel getekend toestemmingsformulier.*
