# Supplementary material for: Pregnancy Outcomes: Effects of Metformin (POEM) study: a protocol for a long-term, multicentre, open-label, randomised controlled trial in gestational diabetes mellitus
Source: PubMed Central journal article supplement — BMJ Open. 2022 Mar 30;12(3):e056282. doi: 10.1136/bmjopen-2021-056282 (PMC8968576; doi:10.1136/bmjopen-2021-056282), 2022-03-30
Supplement: bmjopen-2021-056282supp002.pdf [file bmjopen-2021-056282supp002.pdf]

**Proefpersoneninformatie en toestemmingsformulier voor de ouders van een kind dat in aanmerking komt voor deelname aan de POEM studie Fase A en B, een medisch-wetenschappelijk onderzoek**

**De POEM studie: een onderzoek ter verbetering van de behandeling van zwangerschapsdiabetes met een verwachte gezondheidswinst voor moeder en kind**

Geachte ouders/wettelijke vertegenwoordiger/ voogd,

U ontvangt deze brief omdat u meedoet aan de POEM studie en uw kind na de geboorte ook vrijwillig mee kan doen aan deze studie. Daarvoor is schriftelijke toestemming nodig van beide ouders. Voordat u beslist of u toestemming geeft om uw kind mee te laten doen, krijgt u uitleg over wat het onderzoek voor uw kind inhoudt. Lees deze informatie rustig door en vraag de onderzoeker meer uitleg als u vragen heeft. U kunt het uiteraard ook bespreken met uw partner, vrienden of familie.

Er doen in totaal 500 zwangere vrouwen mee aan dit onderzoek in Nederland. De Centrale Commissie Mensgebonden Onderzoek heeft dit onderzoek goedgekeurd. Algemene informatie over meedoen en toetsing van onderzoek vindt u in de brochure 'Medisch-wetenschappelijk onderzoek' (VWS). Deze kunt u downloaden op: <https://www.rijksoverheid.nl/documenten/brochures/2014/09/01/medisch-wetenschappelijk-onderzoek-algemene-informatie-voor-de-proefpersoon>.

## 1. Doel van het onderzoek met betrekking tot het kind

Het doel van de POEM studie is om de veiligheid, het gemak, de meerwaarde en de gezondheidswinst van metformine aan te tonen bij de behandeling van zwangerschapsdiabetes op korte en lange termijn bij moeder en kind. Metformine is al geregistreerd voor de behandeling van diabetes, maar nog niet bij zwangerschapsdiabetes.

De POEM studie bestaat uit 3 fasen. Fase A start vanaf de vaststelling van zwangerschapsdiabetes tot 6 weken na de bevalling. Fase B loopt van 6 weken tot 1 jaar na de bevalling. U heeft aangegeven mee te willen doen aan fase A en B. In deze fasen gebruikt de helft van de deelnemende moeders aan de studie metformine. De andere helft is de controlegroep, die de bestaande behandeling voor zwangerschapsdiabetes krijgt.

Om ook de effecten van metformine op het kind te onderzoeken volgen we ook graag vanaf de geboorte de ontwikkeling van het kind. Hiervoor vragen wij nu uw toestemming. Dit betreft dus de laatste 6 weken van Fase A en Fase B.

*Tot slot observeren we in Fase C wat het gebruik van metformine in Fase A en B door moeder op lange termijn voor effect heeft op zowel moeder als kind. Er wordt in Fase C geen studiemedicatie meer gebruikt. Aan het eind van Fase B zullen wij u om toestemming vragen om mee te doen aan Fase C, zowel voor moeder als kind. Voor de volledigheid wordt in deze informatiebrief wel informatie gegeven over Fase C, waarin we u en uw kind graag 1 keer per jaar zien om na te gaan hoe het met u en uw kind gaat tot en met de puberteitsontwikkeling en volwassenwording tot 20 jaar na de bevalling.*

Voordelen voor het kind van de behandeling met metformine die de moeder heeft ontvangen kunnen zijn: minder aangeboren afwijkingen, minder kans op overgewicht, minder kans op type 2 diabetes, een gezondere geslachtsrijping en schoolontwikkeling. We verwachten geen nadelige effecten voor moeder en kind.

## Proefpersoneninformatie en toestemmingsformulier voor de ouders van een kind dat in aanmerking komt voor deelname aan de POEM studie Fase A en B, een medisch-wetenschappelijk onderzoek

### 2. Wat meedoen voor uw kind betekent

De volgende handelingen en metingen worden gedaan bij uw kind in het kader van het onderzoek:

- Afname navelstrengbloed voor nader onderzoek. (Fase A)
- Opvang eerste urine na de geboorte voor nader onderzoek. (Fase A)
- Bezoek bij onderzoeker samen met moeder: 1 keer in Fase A, 2 keer in Fase B ter beoordeling van de ontwikkeling van het kind. *In Fase C eenmaal per jaar.*
- Inleveren van urine: 1 keer in Fase A, 2 keer in Fase B. *In Fase C 5 keer.*

### 3. Wat wordt er van u verwacht

Om het onderzoek goed te kunnen uitvoeren is het belangrijk dat u contact opneemt met de onderzoeker:

- als uw kind in een ziekenhuis wordt opgenomen of behandeld;
- als u niet meer wilt dat uw kind meedoet aan het onderzoek;
- als uw kind geneesmiddelen gaat gebruiken (ook homeopathische middelen en natuurgeneesmiddelen);
- als de contactgegevens wijzigen.

Ook verwachten wij dat u en uw kind zich aan de volgende afspraken houden:

- er kan niet meegedaan worden aan een ander medisch- wetenschappelijk onderzoek gedurende dit onderzoek;
- de afspraken voor de bezoeken worden nagekomen;
- de deelnemerskaart van het onderzoek laat u zien als u bij een andere arts komt.

### 4. Mogelijke voor- en nadelen van deelname aan onderzoek

Deelname aan dit onderzoek betekent dat u met uw kind jaarlijks het onderzoekscentrum bezoekt. Uw eigen bezoeken worden gecombineerd met de bezoeken van uw kind aan het onderzoekscentrum.

Nadelen van meedoen aan het onderzoek kunnen zijn dat u en uw kind tijd kwijt zijn aan de bezoeken die u moet afleggen.

### 5. Als u niet wilt meedoen of wilt stoppen met het onderzoek

Deelname is altijd vrijwillig. De toestemming van beide ouders is nodig voor deelname van uw kind aan dit onderzoek. Als uw kind de leeftijd bereikt heeft van 12 jaar zal uw kind ook zelf toestemming moeten geven, naast uw toestemming. Als uw kind de leeftijd van 16 jaar heeft bereikt is zijn toestemming toereikend, u hoeft dan als ouders niet meer mee te tekenen.

Gedurende het onderzoek wordt het gedrag van uw kind op verzet beoordeeld. Blijkt dat het verzet groter is dan normaal in soortgelijke situaties, dan is dat een reden om de handelingen voor het onderzoek niet uit te voeren of te stoppen met het onderzoek. De gegevens die tot dat moment zijn verzameld, worden gebruikt voor het onderzoek. Als u dat wilt, kan verzameld lichaamsmateriaal van uw kind zoals urine, worden vernietigd.

## **Proefpersoneninformatie en toestemmingsformulier voor de ouders van een kind dat in aanmerking komt voor deelname aan de POEM studie Fase A en B, een medisch-wetenschappelijk onderzoek**

### **6. Einde van het onderzoek**

Deelname van uw kind aan het onderzoek stopt als:

- alle bezoeken in het kader van dit onderzoek zijn uitgevoerd;
- uw kind hevig verzet vertoont groter dan normaal in afwijkende situaties;
- ouders besluiten om te stoppen;
- het einde van het hele onderzoek is bereikt;
- de onderzoeker het beter voor uw kind vindt om te stoppen;
- de ethische toetsingscommissie of de overheid besluit om het onderzoek te stoppen.

Het hele onderzoek is afgelopen als alle deelnemers klaar zijn.

### **7. Gebruik en bewaren van gegevens en lichaamsmateriaal**

Voor dit onderzoek is het nodig dat lichaamsmateriaal (urinemonsters) en medische en persoonsgegevens van uw kind worden verzameld en gebruikt. Uw kind krijgt een code die op het lichaamsmateriaal en de gegevens komt te staan. De naam van uw kind wordt weggelaten. De privacy van uw kind is zo gewaarborgd.

#### **Uw gegevens**

Alle gegevens blijven vertrouwelijk. Alleen het onderzoeksteam (arts en verpleegkundigen) weten welke code uw kind heeft. Wij geven de gegevens van uw kind door aan de opdrachtgever, het onderzoekscentrum van de POEM studie, maar alleen met die code, nooit met de naam. De sleutel voor de code blijft bij de onderzoeker. Ook in rapporten over het onderzoek wordt alleen die code gebruikt. Sommige mensen mogen uw medische- en persoonsgegevens inzien. Dit is om te controleren of het onderzoek goed en betrouwbaar is. Algemene informatie hierover vindt u in de brochure 'Medisch-wetenschappelijk onderzoek' van VWS.

Mensen die uw gegevens kunnen inzien zijn: het onderzoeksteam, een deskundig controleur en de Inspectie voor de Gezondheidszorg. Zij houden uw gegevens geheim. Als u de toestemmingsverklaring ondertekent, geeft u toestemming voor het verzamelen, bewaren en inzien van uw medische en persoonsgegevens. De onderzoeker bewaart de gegevens minstens 15 jaar na afronding van het onderzoek.

#### **Lichaamsmateriaal**

Verkregen lichaamsmateriaal (urine) bewaren we gecodeerd, zorgvuldig en geanonimiseerd. Het lichaamsmateriaal wordt gebruikt om de effecten van metformine te kunnen vaststellen. Er wordt gekeken naar veranderingen in de stofwisseling die kunnen leiden tot het krijgen of voorkomen van chronische ziekten (zoals diabetes, hoge bloeddruk, hart en vaatziekten en kanker) en van belang zijn in belangrijke ontwikkelingen (puberteit, hormonale, geestelijke en intellectuele ontwikkeling). Het lichaamsmateriaal zal minstens 15 jaar na afronding van het onderzoek worden bewaard.

## **Proefpersoneninformatie en toestemmingsformulier voor de ouders van een kind dat in aanmerking komt voor deelname aan de POEM studie Fase A en B, een medisch-wetenschappelijk onderzoek**

### **Later gebruik gegevens en/of lichaamsmateriaal**

Wij willen ook urinemonsters invriezen en bewaren om nieuwe inzichten over de lange-termijn effecten van metformine bij zwangerschapsdiabetes te verkrijgen. Op het toestemmingsformulier kunt u aangeven of u hiermee akkoord gaat. U kunt deze toestemming altijd weer intrekken. De urinemonsters worden dan vernietigd. Als er al metingen in de monsters zijn gedaan, worden de resultaten daarvan wel gebruikt. De POEM studie wordt gesteund door het Ministerie van VWS en is officieel geregistreerd in een internationaal erkend wetenschappelijk onderzoeksregister ([www.clinicaltrials.gov](http://www.clinicaltrials.gov)). Deze website bevat geen informatie die herleidbaar is tot u als persoon. Wel kan de website een samenvatting van de resultaten tonen. Algemene informatie over de registratie van onderzoeken vindt u in de brochure 'Medisch-wetenschappelijk onderzoek' van het Ministerie van VWS.

### **8. Verzekering voor proefpersonen**

Omdat het kind zelf geen medicatie tot zich neemt en het opvangen van urine geen risico's kent, is een proefpersonenverzekering voor het kind niet noodzakelijk.

### **9. Informeren huisarts en/of behandelend specialist en/of apotheker**

Wij sturen uw huisarts een brief om te laten weten dat uw kind meedoet aan het onderzoek. Dit is in het belang van uw kind en een voorwaarde om mee te doen. Uw kind kan niet deelnemen als u geen huisarts heeft.

### **10. Vergoeding voor meedoen**

U of uw kind wordt niet betaald voor het meedoen aan dit onderzoek. De testen van het onderzoek kosten u niets. Voor uw bezoeken in het kader van het onderzoek krijgt u een reiskostenvergoeding, parkeergeld en eventuele kosten voor een maaltijd.

### **11. Heeft u vragen?**

Bij vragen kunt u contact opnemen met het onderzoeksteam. Voor onafhankelijk advies over meedoen aan dit onderzoek kunt u terecht bij de onafhankelijke arts. Hij weet veel over het onderzoek, maar heeft niets te maken met dit onderzoek. Bij klachten kunt u altijd terecht bij ons studieteam of zo nodig extern bij de Klachtenfunctionaris. Alle gegevens hiervoor vindt u in **bijlage A**: Contactgegevens.

### **12. Bijlagen bij deze informatie**

- A. Contactgegevens
- B. Toestemmingsformulier ouders Fase A en B

**Proefpersoneninformatie en toestemmingsformulier voor de ouders van een kind dat in aanmerking komt voor deelname aan de POEM studie Fase A en B, een medisch-wetenschappelijk onderzoek**

**Bijlage A: Contactgegevens voor**

Hoofdonderzoeker:

Onderzoekslocatie:

Adres:

Telefoonnummer:

In spoedgevallen buiten kantooruren kunt u contact opnemen met het telefoonnummer van de huisartsenpost 0528 – 286222 (of: de huisartsenpost van uw woonplaats).

Onderzoeksverpleegkundige:

Onderzoekscentrum:

Adres:

Telefoonnummer:

Onafhankelijk arts:

Locatie:

Adres:

Telefoonnummer:

Onafhankelijk arts:

Locatie:

Adres:

Telefoonnummer

Als u klachten heeft met betrekking tot dit onderzoek kunt u dit melden aan het onderzoeksteam of contact opnemen met de Klachtenfunctionaris.

Klachtenfunctionaris:

**Proefpersoneninformatie en toestemmingsformulier voor de ouders van een kind dat in aanmerking komt voor deelname aan de POEM studie Fase A en B, een medisch-wetenschappelijk onderzoek**

**Bijlage B: Toestemmingsformulier ouders of voogd Fase A en B kind**

**POEM studie: een lange termijn, gerandomiseerd onderzoek ter verbetering van de behandeling van zwangerschapsdiabetes.**

Ik ben gevraagd om toestemming te geven voor deelname van mijn kind aan dit medisch-wetenschappelijke onderzoek:

Naam proefpersoon (kind):\*

Geboortedatum: \_\_ / \_\_ / \_\_ \*

<verplicht>

- Ik heb de informatiebrief voor de proefpersoon ouders/ verzorgers gelezen. Ook kon ik vragen stellen. Mijn vragen zijn voldoende beantwoord. Ik had genoeg tijd om te beslissen of ik wil dat mijn kind meedoet.
- Ik weet dat meedoen vrijwillig is. Ook weet ik dat ik op ieder moment kan beslissen dat mijn kind toch niet meedoet. Daarvoor hoef ik geen reden te geven.
- Als sprake is van verzet van mijn kind bij het onderzoek, vervalt mijn toestemming voor verdere deelname aan het onderzoek.
- Ik geef toestemming om de huisarts die mijn kind behandelt te informeren dat mijn kind meedoet aan dit onderzoek.
- Ik weet dat sommige mensen de gegevens van mijn kind kunnen inzien. Die mensen staan vermeld in deze informatiebrief.
- Ik geef toestemming voor gebruik van de urinemonsters op de manier en voor de doelen die in de informatiebrief staan.
- Ik geef toestemming om de gegevens van mijn kind nog 15 jaar na dit onderzoek te bewaren.
- Ik geef  **WEL**  
 **GEEN**

toestemming om het lichaamsmateriaal nog 15 jaar na dit onderzoek te bewaren. Mogelijk kan dit later nog voor meer onderzoek worden gebruikt, zoals in de informatiebrief staat.

- Ik ga ermee akkoord dat mijn kind meedoet aan  Fase A en B (leeftijd 0 -1 jaar)
- Ik geef  **WEL**  
 **GEEN**

toestemming om mij na dit onderzoek opnieuw te benaderen voor een vervolg onderzoek (Fase C).

Naam ouder/voogd\*\*:

Handtekening:

Datum: \_\_ / \_\_ / \_\_

Naam ouder/voogd\*\*:

Handtekening:

Datum: \_\_ / \_\_ / \_\_

-----  
Ik verklaar hierbij dat ik bovengenoemde persoon/personen volledig heb geïnformeerd over het genoemde onderzoek. Als er tijdens het onderzoek informatie bekend wordt die de toestemming van de ouder of voogd zou kunnen beïnvloeden, dan breng ik hem/haar daarvan tijdig op de hoogte.

**Proefpersoneninformatie en toestemmingsformulier voor de ouders van een kind dat in aanmerking komt voor deelname aan de POEM studie Fase A en B, een medisch-wetenschappelijk onderzoek**

Naam onderzoeker:

Handtekening:

Datum: \_\_ / \_\_ / \_\_

-----  
Aanvullende informatie is gegeven door:

Naam:

Functie:

Handtekening

Datum: \_\_ / \_\_ / \_\_

-----  
\* Deze informatie wordt na de geboorte aangevuld op dit toestemmingsformulier.

\*\* Doorhalen wat niet van toepassing is.

*De ouders en/ of voogd van de proefpersoon krijgen een volledige informatiebrief mee, samen met een origineel getekend toestemmingsformulier.*
