# Supplementary material for: Pregnancy Outcomes: Effects of Metformin (POEM) study: a protocol for a long-term, multicentre, open-label, randomised controlled trial in gestational diabetes mellitus
Source: PubMed Central journal article supplement — BMJ Open. 2022 Mar 30;12(3):e056282. doi: 10.1136/bmjopen-2021-056282 (PMC8968576; doi:10.1136/bmjopen-2021-056282), 2022-03-30
Supplement: bmjopen-2021-056282supp003.pdf [file bmjopen-2021-056282supp003.pdf]

**Secondary outcomes**

| <b>Phase A</b>                                                        |                                                                                   |
|-----------------------------------------------------------------------|-----------------------------------------------------------------------------------|
| <b>Mother</b>                                                         | <b>Child</b>                                                                      |
| Maternal weight at inclusion, weight gain                             | Intra-uterine growth measurements by ultrasonography                              |
| Maternal glycemic control: FPG and glucose tolerance at GDM diagnosis | Fetal weight and percentile at delivery                                           |
| Proteinuria (UACR)                                                    | Fetal macrosomia                                                                  |
| Insulin rescue and mean daily dose of insulin                         | LGA (neonatal weight > p90)                                                       |
| Acceptability of treatment                                            | <i>Unfavourable neonatal outcome score (NOS)</i>                                  |
| Maternal urinary tract infection (no and %)                           | IRDS needing CPAP, optiflow, mechanical ventilation and/or surfactant replacement |
| <i>Unfavourable maternal outcome score (MOS)</i>                      | Stillbirth and neonatal death                                                     |
| Caesarean delivery                                                    | Preterm birth (birth < 37.0 weeks)                                                |
| Pre-eclampsia, eclampsia, HELPP and gestational hypertension          | Shoulder dystocia                                                                 |
| Maternal mortality                                                    | Instrumental delivery                                                             |
| Postpartum hemorrhage                                                 | Caesarean delivery                                                                |
| Thrombosis (in pregnancy and/or childbed)                             | Neonatal hypoglycaemia < 2.6 mmol/l                                               |
| Each separate neonatal component of GOS                               | Neonatal jaundice needing phototherapy                                            |
|                                                                       | NICU admission                                                                    |
|                                                                       | Apgar score as a variable                                                         |
|                                                                       | Apgar score < 7 at 5 minutes                                                      |
|                                                                       | Congenital anomaly                                                                |
|                                                                       | Each separate neonatal component of GOS                                           |

  

| <b>Phase B and C</b>                               |                                          |
|----------------------------------------------------|------------------------------------------|
| <b>Mother</b>                                      | <b>Child</b>                             |
| Incidence of T2DM and pre-diabetes                 | Growth and weight development            |
| Weight and BMI (category) development              | Gonadal and gender development           |
| Incidence of hypertension                          | Puberty and maturation                   |
| Thrombotic and CVD (cardiovascular disease) events | Educational and intellectual development |
| Development of chronic disease                     | Development of chronic disease           |
